# Supplementary material
Source: PubMed Central journal article supplement (PMC8473710)
Supplement: NIHMS1626802-supplement-2.pdf [file NIHMS1626802-supplement-2.pdf]

# THE LANCET

## Supplementary appendix

This appendix formed part of the original submission and has been peer reviewed.  
We post it as supplied by the authors.

Supplement to: Gureje O, Appiah-Poku J, Bello T, et al. Effect of collaborative care between traditional and faith healers and primary health-care workers on psychosis outcomes in Nigeria and Ghana (COSIMPO): a cluster randomised controlled trial. *Lancet* 2020; **396**: 612–22.

**ONLINE TABLE 1: Change in mean scores between the groups**

|               | <b>Baseline mean scores</b> | <b>3-month month mean scores</b> | <b>Adjusted between-group mean difference (95% CI), p value</b> | <b>P value</b> | <b>6-month mean scores</b> | <b>Adjusted between-group mean difference averaged over three time points (95% C.I.)</b> | <b>P value</b> |
|---------------|-----------------------------|----------------------------------|-----------------------------------------------------------------|----------------|----------------------------|------------------------------------------------------------------------------------------|----------------|
| <b>PANSS</b>  |                             |                                  |                                                                 |                |                            |                                                                                          |                |
| Intervention  | 107.3<br>(17.50)            | 71.2<br>(21.62)                  | -11.7 (-16.9 to -6.4)*                                          | 0.0001         | 53.41 (19.89)              | -13.85 (-20, -7.73)*                                                                     | 0.0010         |
| Control       | 108.91<br>(18.34)           | 84.0<br>(23.59)                  |                                                                 |                | 67.6 (23.26)               |                                                                                          |                |
| <b>WHODAS</b> |                             |                                  |                                                                 |                |                            |                                                                                          |                |
| Intervention  | 94.7 (29.49)                | 62.6<br>(24.81)                  | -10.5 (-17.9 to -3.1)**                                         | 0.0001         | 52.4 (25.00)               | -9.34 (-17.2, -1.46)**                                                                   | 0.0210         |
| Control       | 91.5 (28.69)                | 69.6<br>(28.97)                  |                                                                 |                | 61.8 (28.27)               |                                                                                          |                |

- Adjusted by baseline PANSS and cluster; \*\* Adjusted by baseline WHODAS and cluster; PANSS is positive and negative syndrome scale; WHODAS is WHO disability adjustment scale.

**ONLINE Table 2: Proportion reporting experiencing harmful treatment practices at different time points**

| <b>Proportion reporting experience</b> | <b>CSC<br/>N (%)</b>                                   | <b>eCAU<br/>N (%)</b>                                  | <b>Adjusted* odds<br/>ratio (95% C.I)</b>                           | <b>p-value</b> |
|----------------------------------------|--------------------------------------------------------|--------------------------------------------------------|---------------------------------------------------------------------|----------------|
| <b>At baseline</b>                     | 94(57.0)                                               | 59(41.8)                                               | 1.68(0.81,3.48)                                                     | 0.1620         |
| <b>At 3 months</b>                     | 24(15.8)                                               | 16(11.9)                                               | 1.10(0.44,2.73)                                                     | 0.8360         |
| <b>At 6 months</b>                     | 13(8.6)                                                | 13(9.7)                                                | 0.65(0.23,1.79)                                                     | 0.4020         |
|                                        |                                                        |                                                        |                                                                     |                |
| <b>Change from<br/>baseline</b>        | <b>Change in<br/>proportion<br/>(95% C.I), p value</b> | <b>Change in<br/>proportion<br/>(95% C.I), p value</b> | <b>Difference<br/>inproportion<br/>between groups<br/>(95% C.I)</b> |                |
| <b>At 3 months</b>                     | -0.43(-0.55 to -0.32);<br><b>0.0001</b>                | -0.31(-0.43 to -0.20);<br><b>0.0001</b>                | -0.12(-0.28 to 0.04)                                                | 0.1440         |
| <b>At 6 months</b>                     | -0.48(-0.60 to -0.37);<br><b>0.0001</b>                | -0.33(-0.45 to -0.21);<br><b>0.0001</b>                | -0.15(-0.32 to 0.01)                                                | 0.0710         |

\*With random effects of participants nested in the random effects for clusters

**ONLINE Table 3: Health service and time costs (mean, SD), by treatment arm point (costs are in 2017/8 US\$)**

|                                                       | 3-month cost prior to baseline |                 | 3-month cost prior to 3-month follow-up |                 | 3-month cost prior to 6-month follow-up |                  | 6-month cost since baseline |                  |
|-------------------------------------------------------|--------------------------------|-----------------|-----------------------------------------|-----------------|-----------------------------------------|------------------|-----------------------------|------------------|
|                                                       | CSC                            | eCAU            | CSC                                     | eCAU            | CSC                                     | eCAU             | CSC                         | eCAU             |
| <b><u>COSIMPO trial costs</u></b>                     |                                |                 |                                         |                 |                                         |                  |                             |                  |
| Cost of incentives to PHCW                            | -                              | -               | 18(10)                                  | -               | 6(10)                                   | -                | 24(19)                      | -                |
| Cost of training (PHCW)                               | -                              | -               | 15(0)                                   | 4(0)            | -                                       | -                | 15(0)                       | 4(0)             |
| Cost of training (TFH)                                | -                              | -               | 21(0)                                   | 7(0)            | -                                       | -                | 21(0)                       | 7(0)             |
| <b>Sub-total</b>                                      | -                              | -               | <b>53(11)</b>                           | <b>11(0)</b>    | <b>6(10)</b>                            | -                | <b>59(19)</b>               | <b>11(0)</b>     |
| <b><u>Formal(biomedical) health service costs</u></b> |                                |                 |                                         |                 |                                         |                  |                             |                  |
| Hospital inpatient care(psychiatric)                  | 2(15)                          | 25(295)         | 4(31)                                   | -               | -                                       | -                | 4(31)                       | -                |
| Hospital inpatient care(non-psychiatric)              | -                              | -               | -                                       | -               | -                                       | -                | -                           | -                |
| Psychiatrist (outpatient)                             | 8(64)                          | 7(29)           | 3(13)                                   | 9(59)           | 8(42)                                   | 9(35)            | 10(47)                      | 18(69)           |
| Primary healthcare doctor                             | 1(4)                           | -               | 2(21)                                   | 0(2)            | 0(2)                                    | -                | 2(21)                       | 0(2)             |
| Other doctor/physician                                | 0(0)                           | -               | 0(0)                                    | 0(0)            | 0(0)                                    | 0(3)             | 0(0)                        | 0(3)             |
| Primary healthcare provider(non-physician)            | 1(6)                           | 2(9)            | 11(25)                                  | 3(10)           | 14(40)                                  | 2(10)            | 25(59)                      | 5(15)            |
| Nurse                                                 | -                              | -               | 28(24)                                  | -               | 6(15)                                   | -                | 34(35)                      | -                |
| Medications                                           | 28(52)                         | 28(54)          | 23(35)                                  | 21(36)          | 13(22)                                  | 15(29)           | 36(42)                      | 36(50)           |
| Lab test cost                                         | 0(4)                           | -               | -                                       | 0(0)            | -                                       | -                | 0(0)                        | 0(0)             |
| Other cost                                            | -                              | -               | 1(15)                                   | 0(1)            | -                                       | -                | 1(15)                       | 0(1)             |
| <b>Sub-total</b>                                      | <b>40(83)</b>                  | <b>62(318)</b>  | <b>72(71)</b>                           | <b>34(73)</b>   | <b>42(77)</b>                           | <b>25(47)</b>    | <b>113(116)</b>             | <b>58(90)</b>    |
| <b><u>Informal (TFH) service costs</u></b>            |                                |                 |                                         |                 |                                         |                  |                             |                  |
| Inpatient care (TFH facilities)                       | 204(302)                       | 171(372)        | 157(226)                                | 114(140)        | 91(126)                                 | 69(84)           | 245(287)                    | 182(179)         |
| Out-patient TFH service                               | 1(15)                          | 0(2)            | 2(9)                                    | 7(36)           | 6(18)                                   | 9(74)            | 8(20)                       | 16(82)           |
| Other TFH costs                                       | -                              | -               | 0(2)                                    | 2(12)           | 0(4)                                    | 1(4)             | 1(4)                        | 2(12)            |
| Rituals/sacrifices cost                               | 8(36)                          | 15(44)          | 2(11)                                   | 8(20)           | 2(16)                                   | 7(18)            | 4(19)                       | 14(30)           |
| <b>Sub-total</b>                                      | <b>214(303)</b>                | <b>186(374)</b> | <b>161(225)</b>                         | <b>130(138)</b> | <b>100(126)</b>                         | <b>86(108)</b>   | <b>257(284)</b>             | <b>214(180)</b>  |
| <b>Total service cost</b>                             | <b>254(316)</b>                | <b>248(673)</b> | <b>283(243)</b>                         | <b>175(148)</b> | <b>148(161)</b>                         | <b>111(112)</b>  | <b>429(334)</b>             | <b>284(191)</b>  |
| Time costs (service user)                             | 38(171)                        | 27(87)          | 6(31)                                   | 13(55)          | 4(45)                                   | 1(16)            | 10(54)                      | 15(63)           |
| Time costs (family/friend)                            | 133(275)                       | 150(672)        | 95(466)                                 | 51(115)         | 96(230)                                 | 179(1216)        | 188(535)                    | 228(1235)        |
| <b>Sub-total</b>                                      | <b>171(393)</b>                | <b>177(677)</b> | <b>101(466)</b>                         | <b>65(131)</b>  | <b>99(233)</b>                          | <b>181(1216)</b> | <b>197(536)</b>             | <b>242(1236)</b> |
| <b>Total service and time cost</b>                    | <b>425(534)</b>                | <b>425(976)</b> | <b>382(548)</b>                         | <b>240(201)</b> | <b>247(318)</b>                         | <b>292(1214)</b> | <b>627(701)</b>             | <b>526(1240)</b> |

CSC, collaborative shared care; eCAU, enhanced care as usual

PANSS, positive syndrome scale; WHODAS, WHO disability assessment scale; PHCW, primary health care workers; TFH, traditional and faith healers.

**ONLINE FIGURE: Scatter graphs showing incremental difference in costs (US\$ over 3 months) and effects between intervention and control groups at 6-month follow-up**

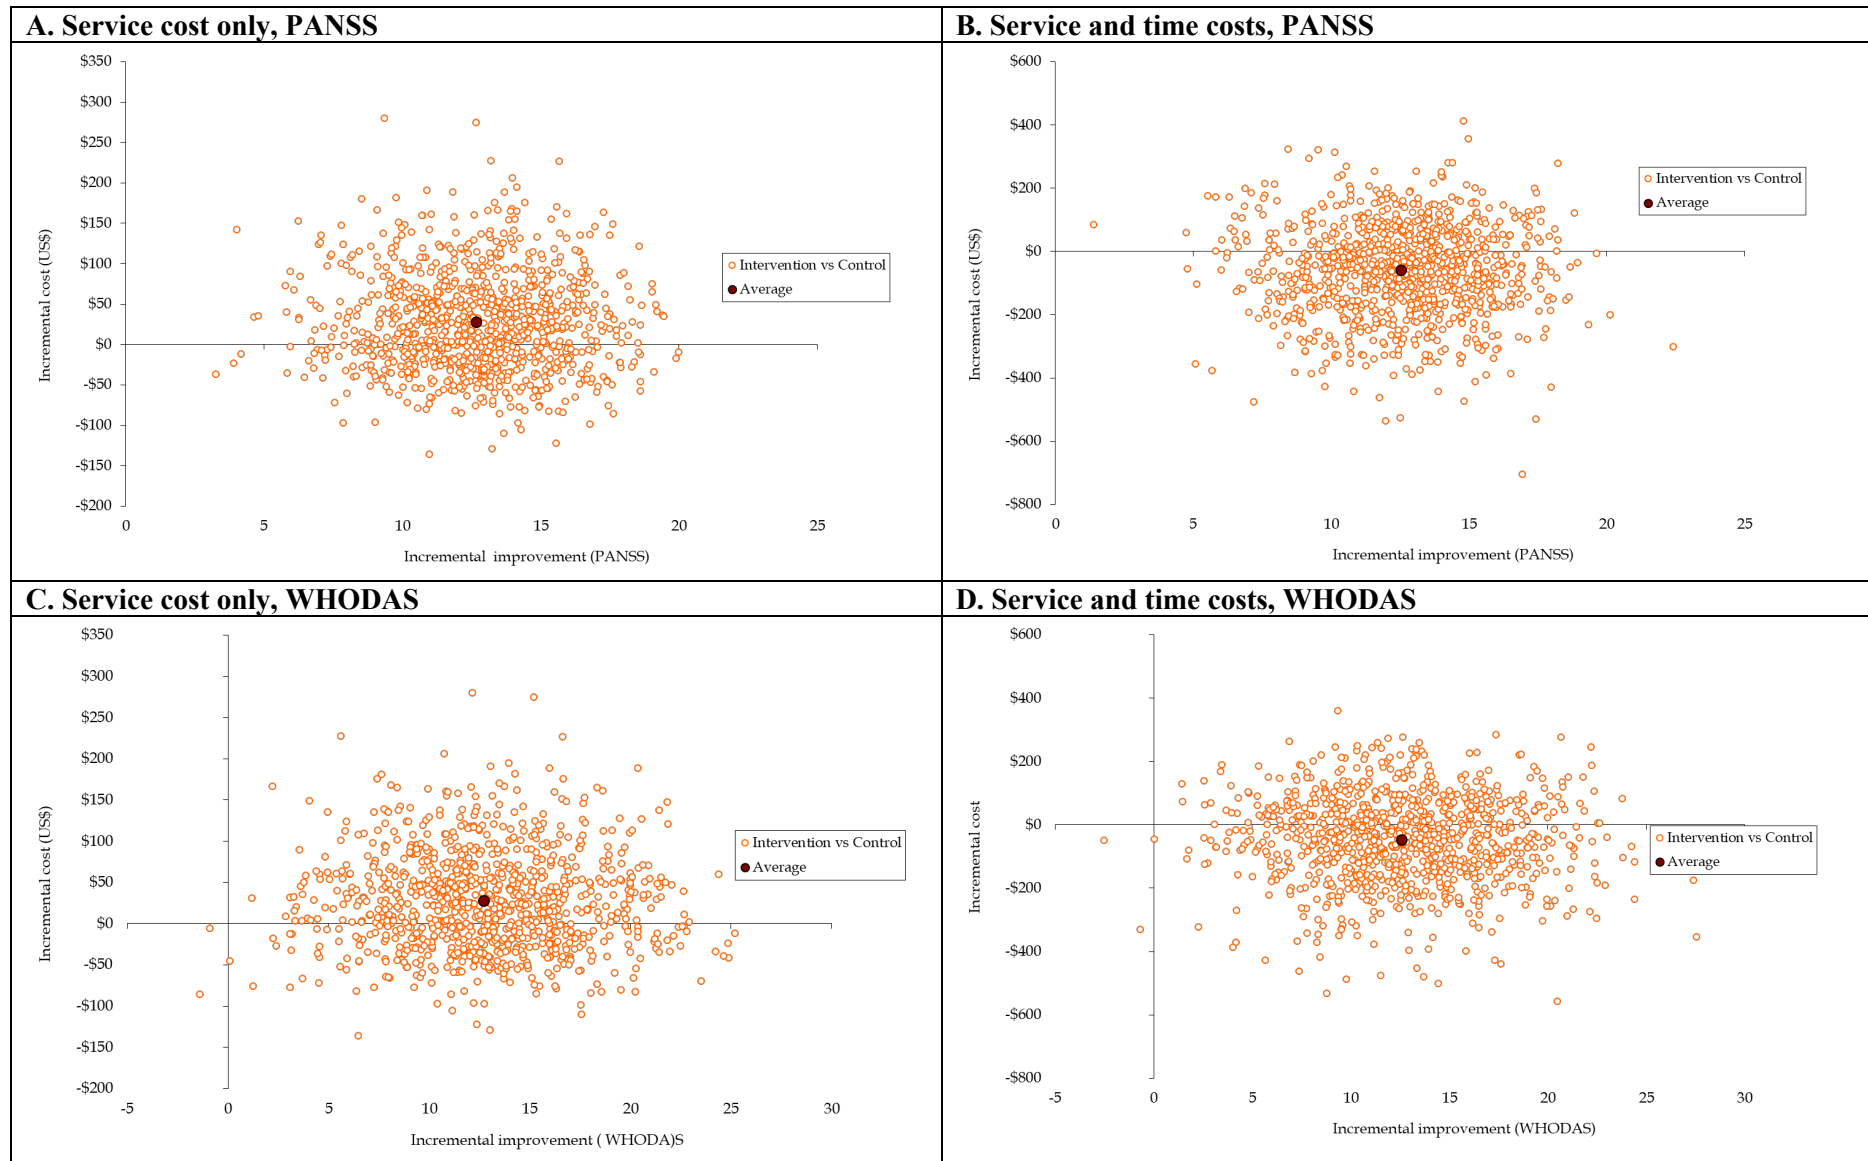

**PANSS, positive and negative syndrome scale; WHODAS, WHO disability assessment scale.**
